# Supplementary material for: Molecular simulations and an experimental study of the oligopeptide-mediated fouling mechanisms of polyamide reverse-osmosis membranes
Source: Royal Society of Chemistry journal article supplement (doi:10.1039/d5cp00221d), 2025-01-01
Supplement: d5cp00221d1.pdf [file d5cp00221d1.pdf]

## Supporting Information

**Molecular simulation and experimental study of the oligopeptide-mediated fouling mechanisms of polyamide reverse-osmosis membranes**

*Ken Kinooka,<sup>a,b</sup> Keizo Nakagawa,<sup>a,c</sup> Hideto Matsuyama,<sup>c,d</sup> Yu Fujimura,<sup>b</sup> Takahiro Kawakatsu,<sup>b</sup> and Tomohisa Yoshioka<sup>\*a,c</sup>*

<sup>a</sup>*Graduate School of Science, Technology and Innovation, Kobe University, 1-1 Rokkodai, Nada, Kobe 657-8501 Japan.*

<sup>b</sup>*Kurita Innovation Hub, Kurita Water Industries Ltd., 1-4-1 Daikanyama, Akishima, Tokyo 196-0005 Japan.*

<sup>c</sup>*Research Center for Membrane and Film Technology, Kobe University, 1-1 Rokkodai, Nada, Kobe 6578501 Japan.*

<sup>d</sup>*Department of Chemical Science and Engineering, Kobe University, 1-1 Rokkodai, Nada, Kobe 657-8501, Japan*

\* Corresponding author; Email: tom@opal.kobe-u.ac.jp

## 1. Simulation model

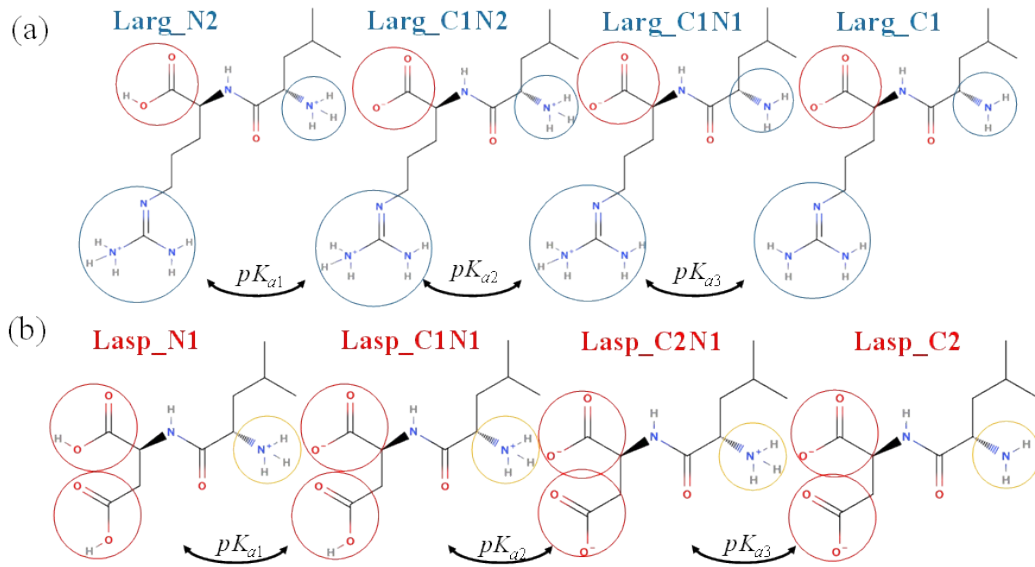

**Figure S1.** Foulant dissociation changes: (a) Larg and (b) Lasp.

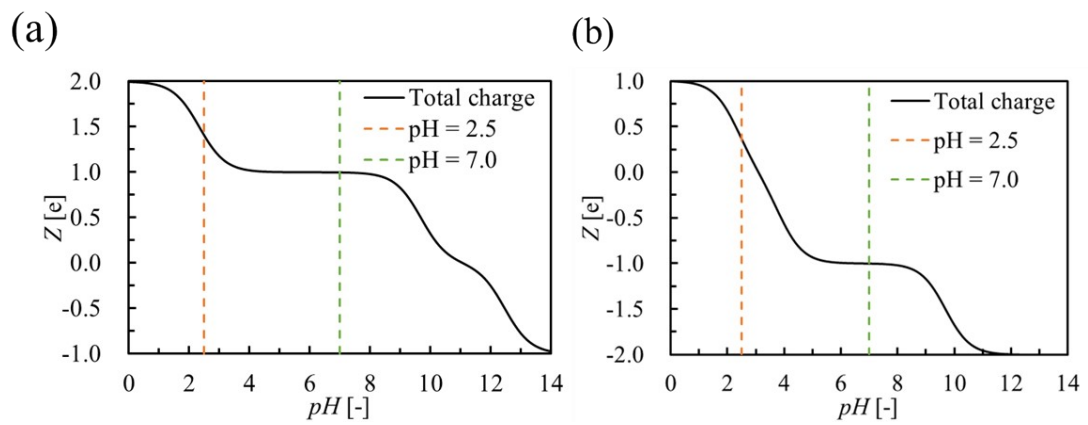

**Figure S2.** Net charges of the foulants according to pH : (a) Larg and (b) Lasp.

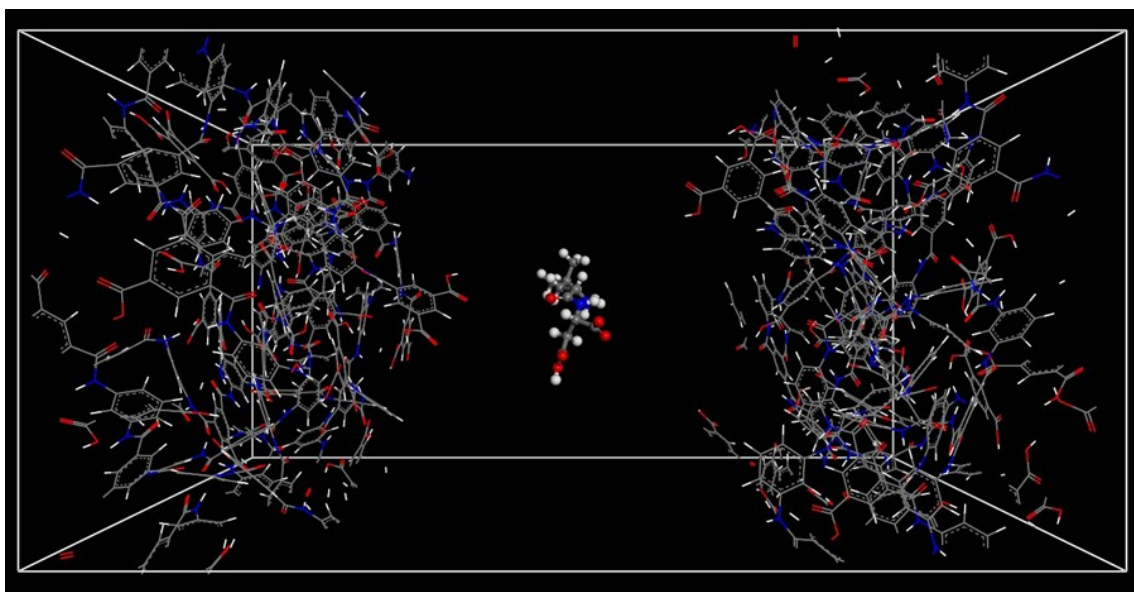

**Figure S3.** Behavior of the adsorption simulation of Model 2 (Lasp\_C1N1/C0).

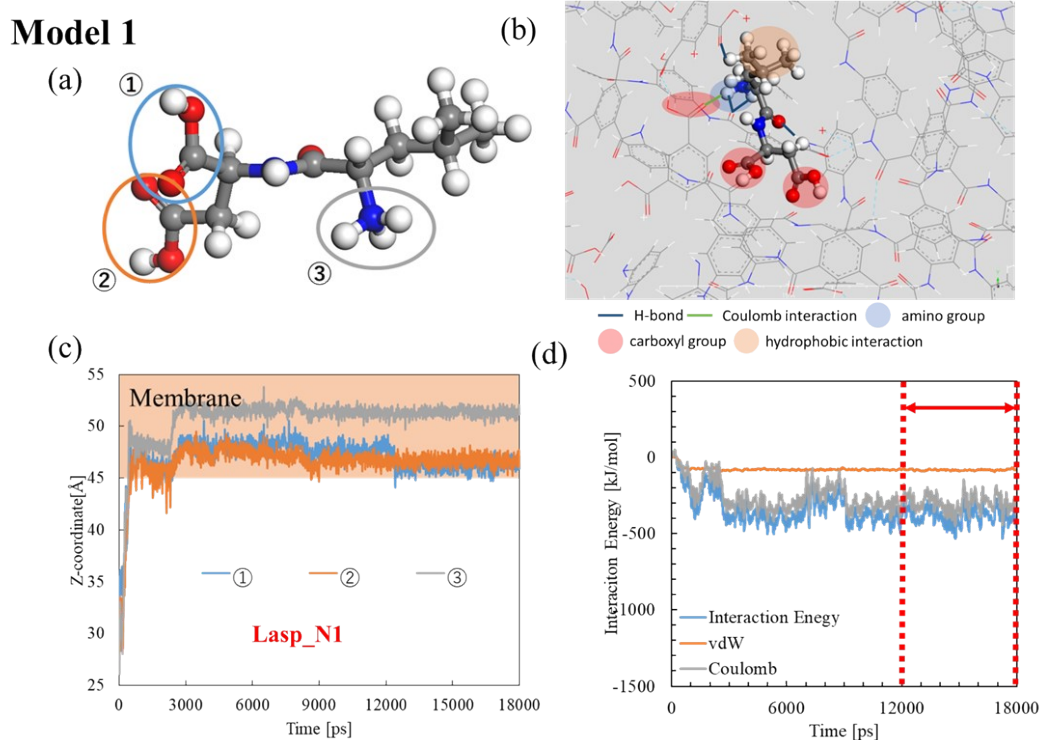

**Figure S4.** Model 1: (a) Lasp\_N1 foulant model, (b) Snapshot of the foulant in the neighbourhood of PA membrane, (c) Z-coordinate change of the foulant along with time, and (d) Interaction energy between the PA membrane and the foulant. The dashed range was used to calculate the average value.

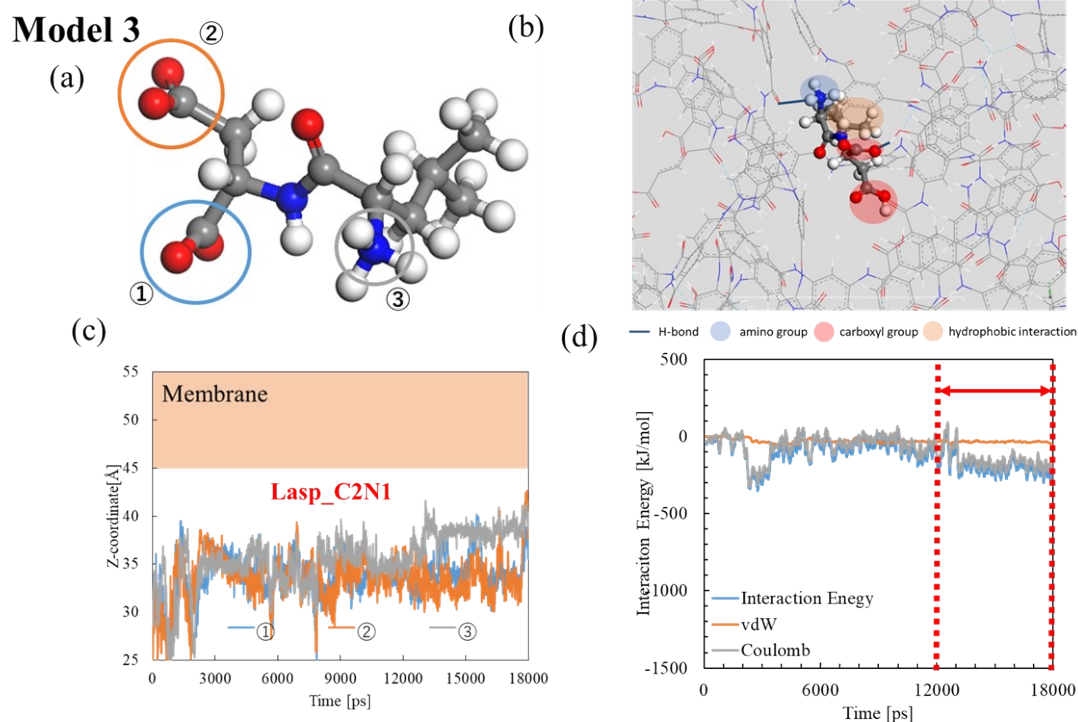

**Figure S5.** Model 3: (a) Lasp\_C2N1 foulant model, (b) Snapshot of the foulant in the neighbourhood of PA membrane, (c) Z-coordinate change of the foulant along with time, and (d) Interaction energy between the PA membrane and the foulant. The dashed range was used to calculate the average value.

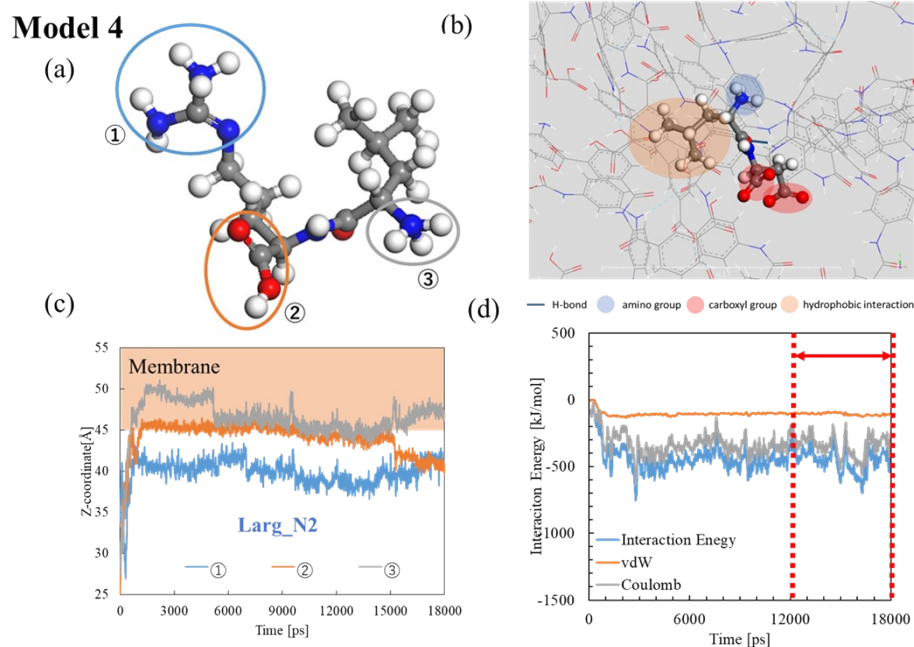

**Figure S6.** Model 4: (a) Larg\_N2 foulant model, (b) Snapshot of the foulant in the neighbourhood of PA membrane, (c) Z-coordinate change of the foulant along with time, and (d) Interaction energy between the PA membrane and the foulant. The dashed range was used to calculate the average value.

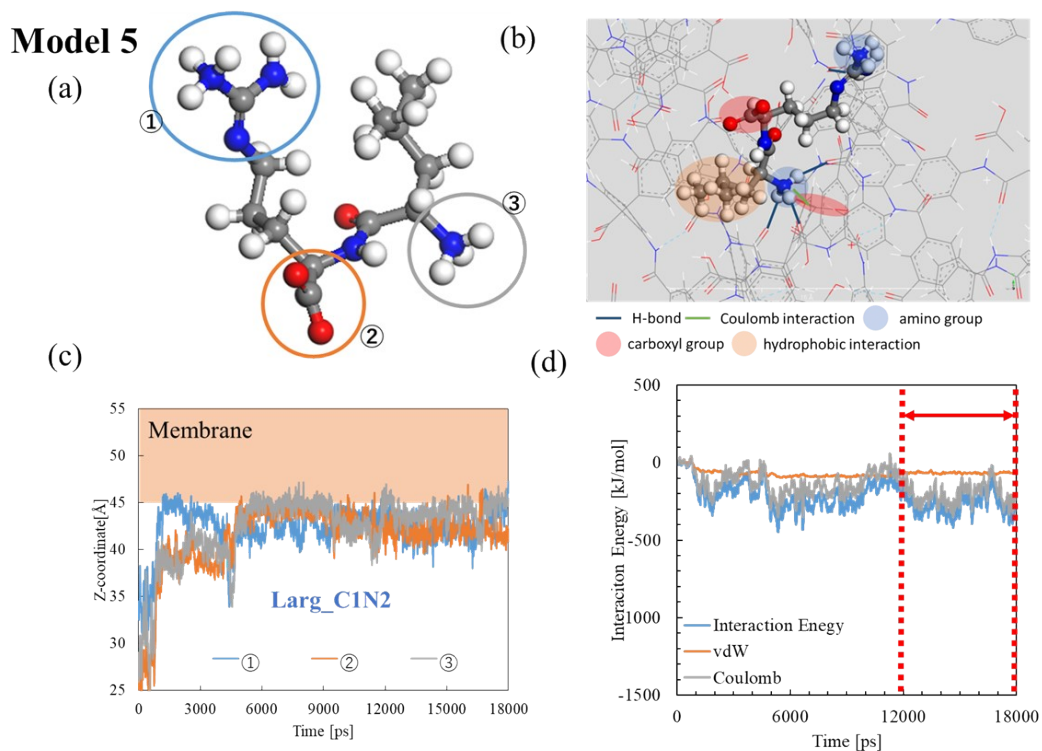

**Figure S7.** Model 5: (a) Larg\_C1N2 foulant model, (b) Snapshot of the foulant in the neighbourhood of PA membrane, (c) Z-coordinate change of the foulant along with time, and (d) Interaction energy between the PA membrane and the foulant. The dashed range was used to calculate the average value.

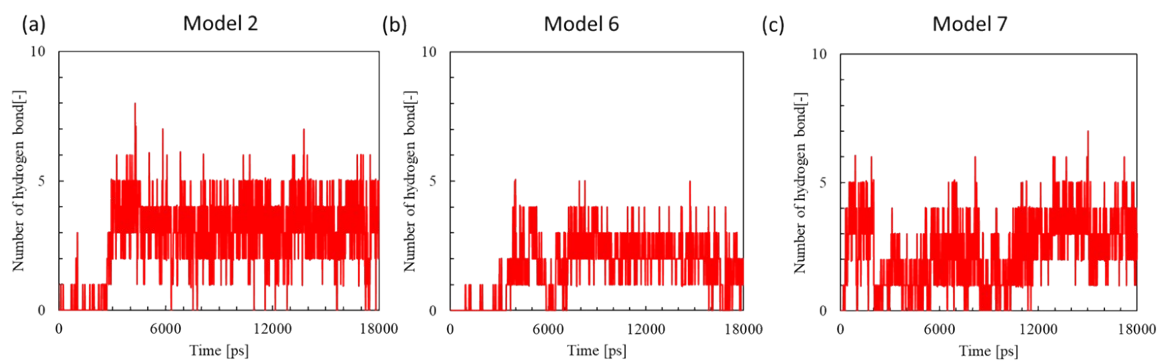

**Figure S8.** The relationship between time and the number of hydrogen bond between the membrane and the foulant (a) Model 2, (b) Model 6, (c) Model 7.

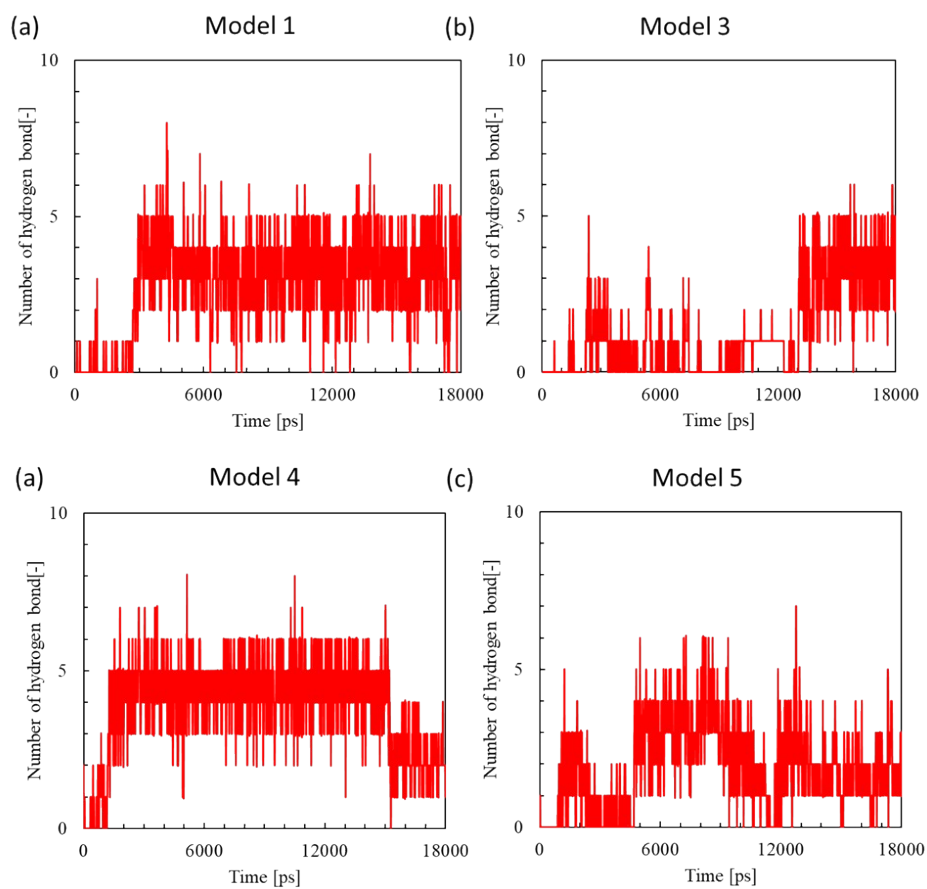

**Figure S9.** The relationship between time and the number of hydrogen bond between the membrane and the foulant (a) Model 1, (b) Model 3, (c) Model 4, (d) Model 5.

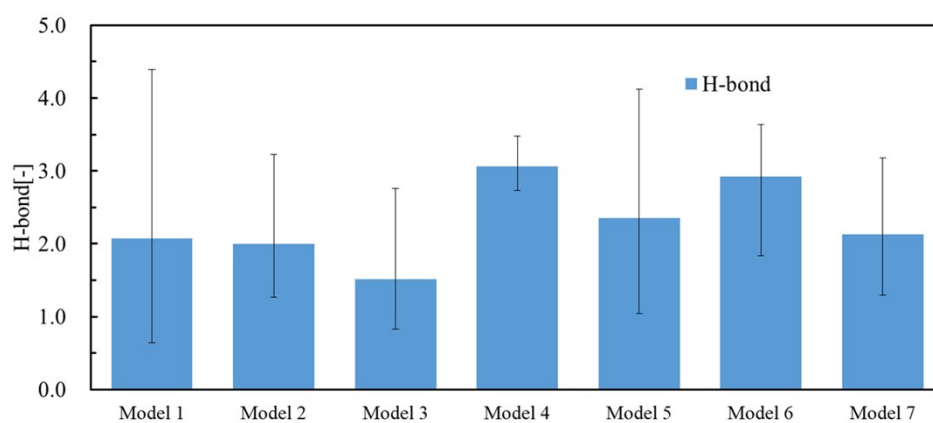

**Figure S10.** The average number of hydrogen bond for each model.

## 2. Membrane properties and performance

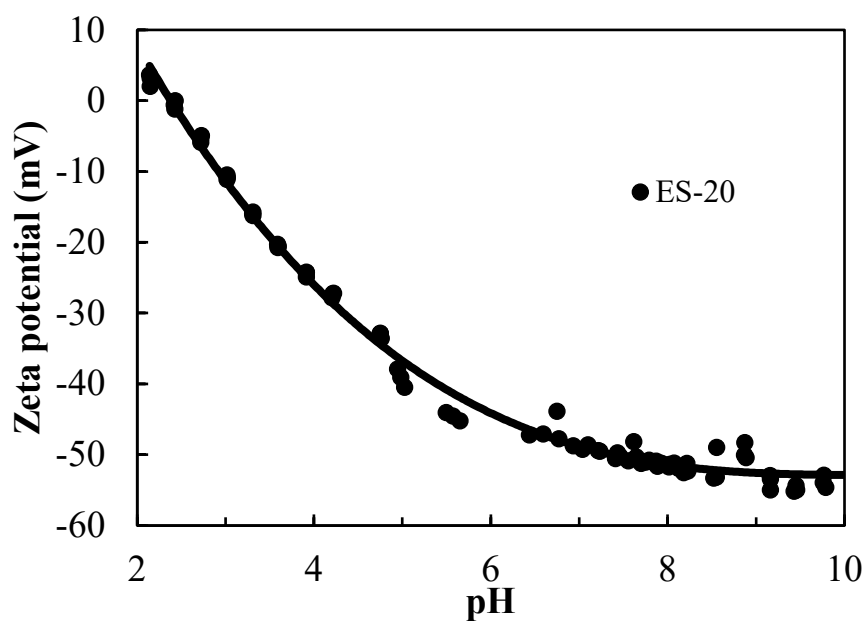

Figure S11. pH dependence of zeta potential of ES-20.

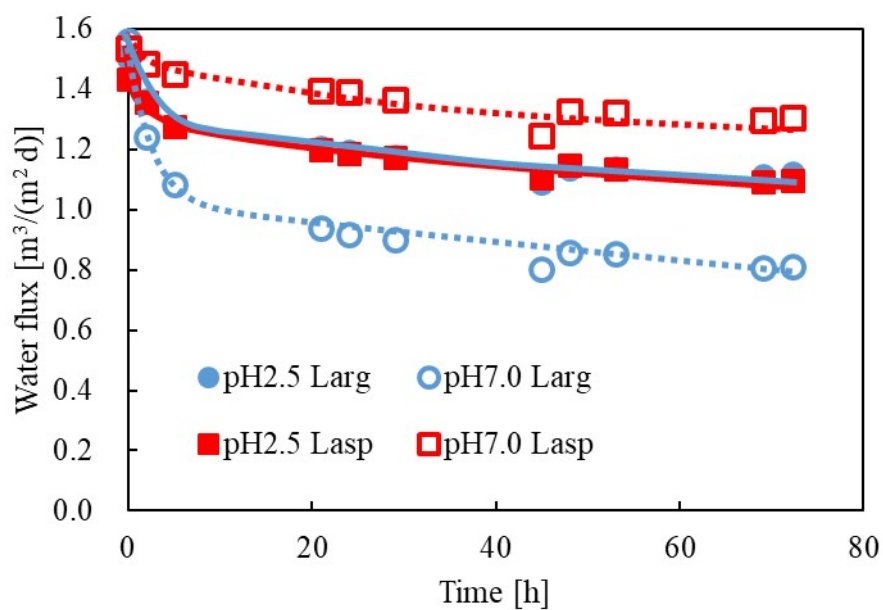

Figure S12. Changes in water flux for Larg and Lasp in ES-20 membranes with time.
